# Supplementary material for: A comprehensive maternal health risk prediction dataset from IoT-enabled medical cyber-physical systems in developing countries: Supporting deep learning applications for clinical decision support
Source: Research Square preprint supplement (doi:10.21203/rs.3.rs-7405384/v1), 2025-09-17
Supplement: Supplementary file 1 [file 155872765a64fa7413e0adb4.pdf]

# Appendix A. IoT System and Deep Learning Specifications

Table A.7: Detailed specifications of IoT sensors used in the MCPS.

| Component Model             |                        | Specifications            | Accuracy |
|-----------------------------|------------------------|---------------------------|----------|
| Microcontroller             | Raspberry Pi 4 Model B | 4GB RAM, 64-bit quad-core | N/A      |
| Temperature Sensor          | DS18B20                | Digital, -55C to +125C    | 0.5C     |
| Blood Pressure Mon-<br>itor | OMRON HEM-7120         | 0299 mmHg                 | 3 mmHg   |
| Pulse Oximeter              | MAX30102               | HR: 25250 bpm             | 2 bpm    |
| Glucometer                  | ACCU-CHEK Active       | 10600 mg/dL               | 15%      |

Table A.7 provides detailed technical specifications of the IoT hardware components used in the medical cyber-physical system.

# Appendix B. RNN Architecture Specifications

Table B.8 details the architectural specifications used for the RNN models with attention mechanisms.

Table B.8: RNN architecture specifications for temporal sequence modeling.

| Parameter      | LSTM + Attention | Configuration           |
|----------------|------------------|-------------------------|
| Input Shape    | (8, 1)           | 8 timesteps, 1 feature  |
| LSTM Units     | 50               | Hidden state dimension  |
| Dropout Rate   | 0.2              | Regularization          |
| Learning Rate  | 0.001            | Adam optimizer          |
| Batch Size     | 32               | Training batch size     |
| Epochs         | 50               | Maximum training epochs |
| Early Stopping | 10               | Patience parameter      |
| Attention Type | Additive         | Bahdanau attention      |
| Output Layer   | Dense(3)         | Softmax activation      |

## Appendix C. Data Collection Protocol

The standardized protocol for data collection included:

- Patient registration and consent
- Sensor calibration (daily)
- Measurement timing (every 30 minutes during 8-hour sessions)
- Data quality checks (automated range validation)
- Clinical validation (weekly review by medical staff)
- Data synchronization (automatic cloud upload every 5 minutes)
